# Supplementary material for: Primary endocrine resistance of ER+ breast cancer with ESR1 mutations interrogated by droplet digital PCR
Source: PubMed Central journal article supplement (PMC9061813; doi:10.1038/s41523-022-00424-y), 2022-05-02
Supplement: 41523_2022_424_MOESM1_ESM.pdf [file 41523_2022_424_MOESM1_ESM.pdf]

## Supplementary information

**Supplementary Table 1.** Baseline characteristics according to *ESR1* mutation in all patients

|                       | ESR1 no mutation (N=112) | ESR1 mutation (N=9) | Total (N=121) | P-value             |
|-----------------------|--------------------------|---------------------|---------------|---------------------|
| Age (median, range)   | 45 (23-77)               | 53 (31-65)          | 45 (23-77)    | 0.554               |
| Histologic type       |                          |                     |               | 0.279 <sup>a</sup>  |
| IDC                   | 100 (89.3%)              | 7 (77.8%)           | 107 (88.4%)   |                     |
| ILC                   | 6 (5.4%)                 | 1 (11.1%)           | 7 (5.8%)      |                     |
| Others                | 6 (5.4%)                 | 1 (11.1%)           | 7 (5.8%)      |                     |
| HG <sup>b</sup>       |                          |                     |               | >0.999 <sup>a</sup> |
| 1 or 2                | 87 (84.5%)               | 7 (87.5%)           | 94 (84.7%)    |                     |
| 3                     | 16 (15.5%)               | 1 (12.5%)           | 17 (15.3%)    |                     |
| LVI <sup>b</sup>      |                          |                     |               | >0.999 <sup>a</sup> |
| no                    | 61 (77.2%)               | 6 (75.0%)           | 67 (77.0%)    |                     |
| yes                   | 18 (22.8%)               | 2 (25.0%)           | 20 (23.0%)    |                     |
| T stage               |                          |                     |               | 0.015 <sup>a</sup>  |
| 1                     | 51 (45.5%)               | 2 (22.2%)           | 53 (43.8%)    |                     |
| 2                     | 56 (50.0%)               | 4 (44.4%)           | 60 (49.6%)    |                     |
| 3                     | 5 (4.5%)                 | 3 (33.3%)           | 8 (6.6%)      |                     |
| N stage               |                          |                     |               | 0.084 <sup>a</sup>  |
| 0                     | 49 (43.8%)               | 1 (11.1%)           | 50 (41.3%)    |                     |
| 1                     | 36 (32.1%)               | 4 (44.4%)           | 40 (33.1%)    |                     |
| 2                     | 14 (12.5%)               | 1 (11.1%)           | 15 (12.4%)    |                     |
| 3                     | 13 (11.6%)               | 3 (33.3%)           | 16 (13.2%)    |                     |
| Stage                 |                          |                     |               | 0.158 <sup>a</sup>  |
| 1                     | 35 (31.3%)               | 1 (11.1%)           | 36 (29.8%)    |                     |
| 2                     | 50 (44.6%)               | 3 (33.3%)           | 53 (43.8%)    |                     |
| 3                     | 27 (24.1%)               | 5 (55.6%)           | 32 (26.4%)    |                     |
| Breast surgery        |                          |                     |               | 0.156 <sup>a</sup>  |
| BCS                   | 42 (37.5%)               | 1 (11.1%)           | 43 (35.5%)    |                     |
| TM                    | 70 (62.5%)               | 8 (88.9%)           | 78 (64.5%)    |                     |
| Axillary surgery      |                          |                     |               | 0.445 <sup>a</sup>  |
| SLNB                  | 30 (26.8%)               | 1 (11.1%)           | 31 (25.6%)    |                     |
| ALND                  | 82 (73.2%)               | 8 (88.9%)           | 90 (74.4%)    |                     |
| Adjuvant chemotherapy |                          |                     |               | >0.999 <sup>a</sup> |
| no                    | 22 (19.8%)               | 1 (11.1%)           | 23 (19.2%)    |                     |
| yes                   | 89 (80.2%)               | 8 (88.9%)           | 97 (80.8%)    |                     |
| Adjuvant endocrine    |                          |                     |               | 0.731 <sup>a</sup>  |
| no                    | 22 (19.6%)               | 1 (11.1%)           | 23 (19.0%)    |                     |
| Tamoxifen             | 55 (49.1%)               | 4 (44.4%)           | 59 (48.8%)    |                     |
| AI                    | 35 (31.3%)               | 4 (44.4%)           | 39 (32.2%)    |                     |
| Adjuvant radiotherapy |                          |                     |               | 0.296 <sup>a</sup>  |
| no                    | 51 (45.5%)               | 2 (22.2%)           | 53 (43.8%)    |                     |
| yes                   | 61 (54.5%)               | 7 (77.8%)           | 68 (56.2%)    |                     |

IDC invasive ductal carcinoma, ILC invasive lobular carcinoma, HG histologic grade, LVI lymphovascular invasion, BCS breast conserving surgery, TM total mastectomy, SLNB sentinel lymph node biopsy, ALND axillary lymph node dissection,

AI aromatase inhibitor.

<sup>a</sup>*P*-values were obtained using Fisher's exact test.

<sup>b</sup>Missing values

**Supplementary Table 2.** Organ involvement in the first recurrence

|                                  | ESR1 no mutation<br>(N=112) | ESR1 mutation (N=9) | Total (N=121) | <i>P</i> -<br>value <sup>a</sup> |
|----------------------------------|-----------------------------|---------------------|---------------|----------------------------------|
| Bone                             | 37 (33.0%)                  | 4 (44.4%)           | 41 (33.9%)    | 0.486                            |
| Lung                             | 26 (23.2%)                  | 3 (33.3%)           | 29 (24.0%)    | 0.446                            |
| Distant lymph node               | 20 (17.9%)                  | 1 (4.8%)            | 21 (17.4%)    | >0.999                           |
| Ipsilateral breast or chest wall | 20 (17.9%)                  | 0                   | 20 (16.5%)    | 0.353                            |
| Liver                            | 16 (14.3%)                  | 3 (33.3%)           | 19 (15.7%)    | 0.149                            |
| Pleura                           | 9 (8.0%)                    | 2 (22.2%)           | 11 (9.1%)     | 0.190                            |
| Ipsilateral axillary lymph node  | 7 (6.3%)                    | 0                   | 7 (5.8%)      | >0.999                           |
| Brain                            | 2 (1.8%)                    | 0                   | 2 (1.7%)      | >0.999                           |
| Skin                             | 2 (1.8%)                    | 0                   | 2 (1.7%)      | >0.999                           |
| Ovary                            | 2 (1.8%)                    | 0                   | 2 (1.7%)      | >0.999                           |

<sup>a</sup>*P*-values were obtained using Fisher's exact test.

**Supplementary Table 3.** Univariate analysis of primary endocrine resistance in the primary and secondary endocrine resistance groups

| Variable              | OR (95% CI)          | P-value |
|-----------------------|----------------------|---------|
| Age                   | 1.001 (0.960-1.044)  | 0.954   |
| Histologic type       |                      |         |
| IDC                   | Ref.                 |         |
| Others                | 1.681 (0.705-4.005)  | 0.241   |
| T stage               |                      |         |
| 1                     | Ref.                 |         |
| 2 or 3                | 2.500 (0.917-6.817)  | 0.073   |
| N stage               |                      |         |
| negative              | Ref.                 |         |
| positive              | 1.189 (0.457-3.094)  | 0.723   |
| Adjuvant chemotherapy |                      |         |
| no                    | Ref.                 |         |
| yes                   | 1.667 (0.468-5.931)  | 0.281   |
| Adjuvant radiotherapy |                      |         |
| no                    | Ref.                 |         |
| yes                   | 1.923 (0.703-5.259)  | 0.292   |
| ESR1 mutation         |                      |         |
| no                    | Ref.                 |         |
| yes                   | 6.000 (1.118-32.198) | 0.009   |

OR odds ratio, CI confidence interval, IDC invasive ductal carcinoma, HG histologic grade, LVI lymphovascular invasion.

**Supplementary Table 4.** Primers and probes used in this study

| Target | ddPCR Primers/probes | Sequence                  | Reference |
|--------|----------------------|---------------------------|-----------|
| E380Q  | Forward Primer       | TGGATTTGACCCTCCATGATCAG   |           |
|        | Reverse Primer       | AGACGAGACCAATCATCAGGATCT  | [1]       |
|        | WT Probe             | CCACCTTCTAGAATGTG         |           |
|        | Mutant Probe         | CCACCTTCTACAATGTG         |           |
| Y537S  | Forward Primer       | GCATGAAGTGCAAGAACGTG      |           |
|        | Reverse Primer       | AAGTGGCTTTGGTCCGTCT       | [2]       |
|        | WT Probe             | TCTATGACCTGCTGCTGGAGATGCT |           |
|        | Mutant Probe         | TCTCTGACCTGCTGCTGGAGATGCT |           |
| Y537C  | Forward Primer       | GCATGAAGTGCAAGAACGTG      |           |
|        | Reverse Primer       | AAGTGGCTTTGGTCCGTCT       | [2]       |
|        | WT Probe             | TCTATGACCTGCTGCTGGAGATGCT |           |
|        | Mutant Probe         | TCTGTGACCTGCTGCTGGAGATGCT |           |
| Y537N  | Forward Primer       | GCATGAAGTGCAAGAACGTG      |           |
|        | Reverse Primer       | AAGTGGCTTTGGTCCGTCT       | [2]       |
|        | WT Probe             | TCTATGACCTGCTGCTGGAGATGCT |           |
|        | Mutant Probe         | TCAATGACCTGCTGCTGGAGATGCT |           |
| D538G  | Forward Primer       | GCATGAAGTGCAAGAACGTG      |           |
|        | Reverse Primer       | AAGTGGCTTTGGTCCGTCT       | [2]       |
|        | WT Probe             | TCTATGACCTGCTGCTGGAGATGCT |           |
|        | Mutant Probe         | TCTATGGCCTGCTGCTGGAGATGCT |           |

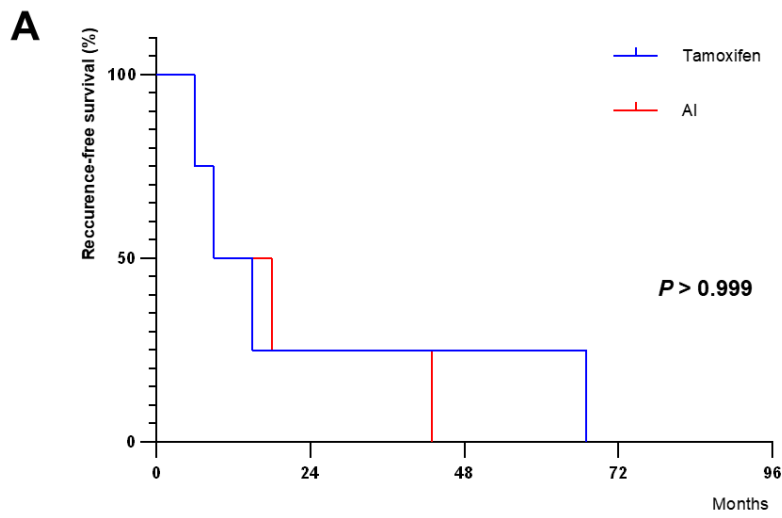

|           |   |   |   |   |   |
|-----------|---|---|---|---|---|
| Tamoxifen | 4 | 1 | 0 | 0 | 0 |
| AI        | 4 | 1 | 0 | 0 | 0 |

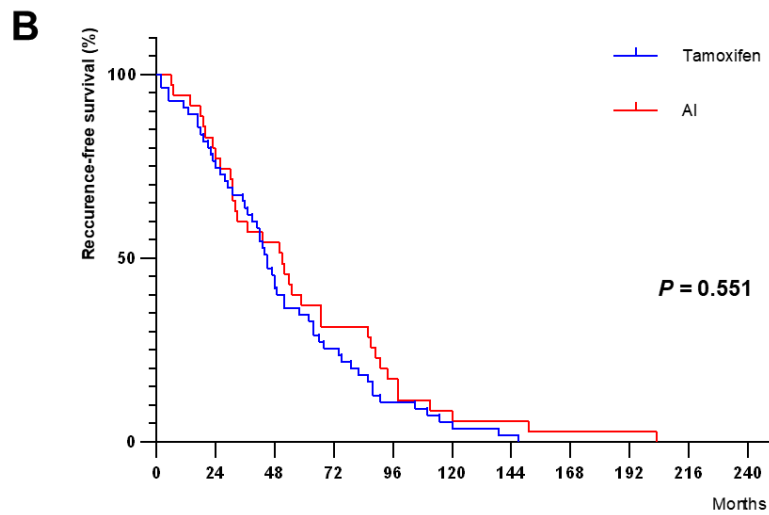

|           |    |    |    |    |   |   |   |   |   |   |
|-----------|----|----|----|----|---|---|---|---|---|---|
| Tamoxifen | 55 | 44 | 27 | 15 | 9 | 4 | 1 | 0 | 0 | 0 |
| AI        | 35 | 29 | 19 | 13 | 8 | 3 | 2 | 1 | 1 | 0 |

**Supplementary Figure 1.** Recurrence-free interval according to endocrine therapy (A) in patients with ESR1 mutation, and (B) in patients without ESR1 mutation
